# Supplementary material for: Effect of regional versus general anesthesia on recurrence of non-muscle invasive bladder cancer: a systematic review and meta-analysis of eight retrospective cohort studies
Source: PubMed Central journal article supplement (PMC10262544; doi:10.1186/s12871-023-02136-7), 2023-06-13

Begg's funnel plot with pseudo 95% confidence limits

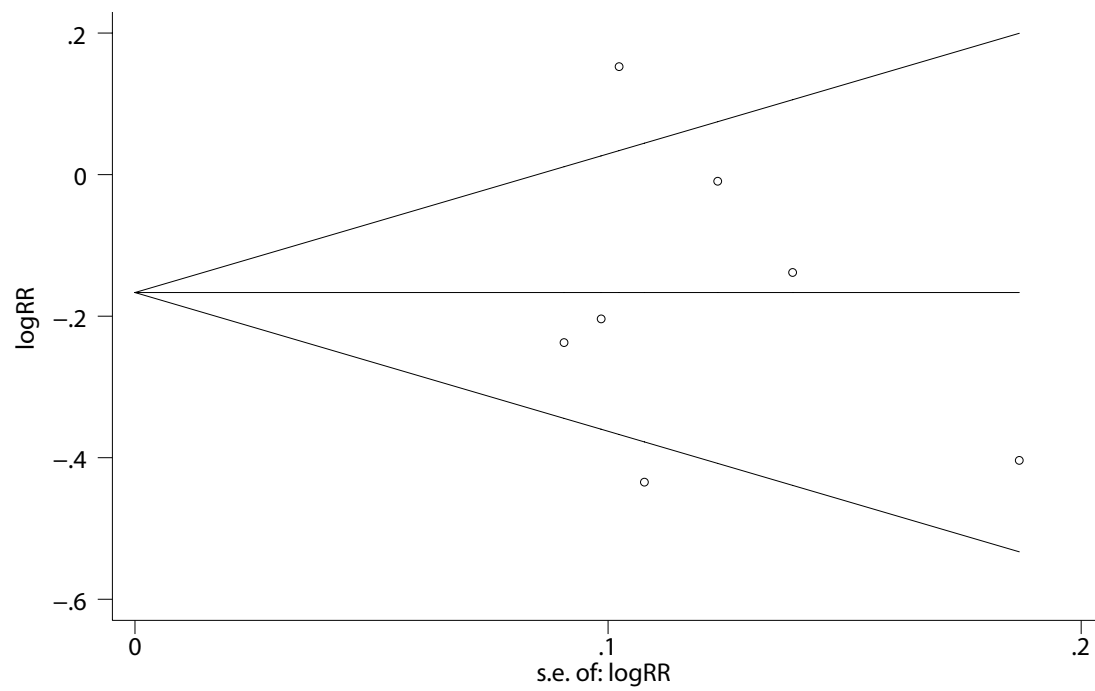

Supplement: 12871_2023_2136_MOESM6_ESM.pdf [file 12871_2023_2136_MOESM6_ESM.pdf]
